# Supplementary material for: Modeling the Greenland englacial stratigraphy
Source: Copernicus journal article supplement (doi:10.5194/tc-15-4539-2021), 2021-09-28
Supplement: Supplementary file [file tc-15-4539-2021-supplement-title-page.pdf › tc-15-4539-2021-supplement-title-page.pdf]

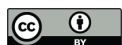

## *Supplement of*

# **Modeling the Greenland englacial stratigraphy**

**Andreas Born and Alexander Robinson**

*Correspondence to:* Andreas Born ([andreas.born@uib.no](mailto:andreas.born@uib.no))

- `tc-15-4539-2021-supplement-title-page.pdf`
- `lhs_ensemble.pickle`
- `read_data.py`
- `yelmo_utils.py`

The copyright of individual parts of the supplement might differ from the article licence.
